# Supplementary material
Source: publisher site journal article supplement (https://www.dovepress.com/get_supplementary_file.php?f=356001.docx)
Supplement: Supplementary file 1 [file get_supplementary_file.php]

**Supplementary Materials for**

**EAT Thickness as A Predominate Feature for Evaluating Arterial Stiffness in Patients with Heart Failure with Preserved Ejection Fraction**

Zhiqiang Liu,1 Weiwei Hu,1 Hanwen Zhang,1 Hongmei Tao,1 Peng Lei,1 Jie Liu,1 Yali Yu,1 Qian Dong,1 Lei Gao,1,* Dongying Zhang,1,*

1Department of Cardiovascular Medicine, The First Affiliated Hospital of Chongqing Medical University, Chongqing, China

**Supplementary Figure 1.**


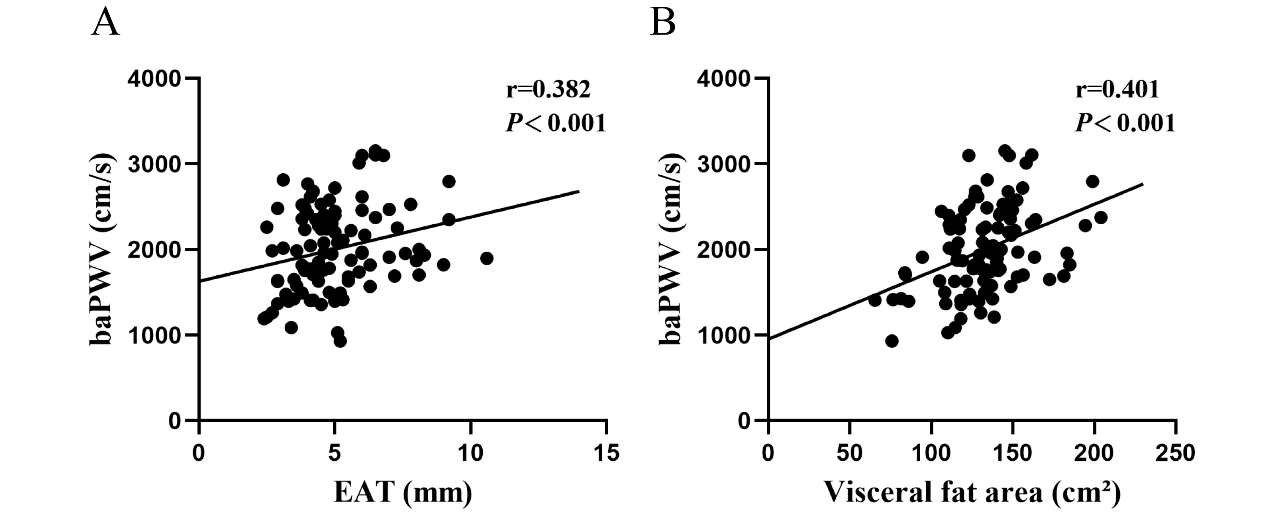


**Supplementary Figure 1.** Scatterplots of correlation analysis between baPWV and EAT, visceral fat area. (A) Correlation analysis of baPWV and EAT. (B) Correlation analysis of baPWV and visceral fat area.

Abbrevidations: baPWV, brachial-ankle pulse wave velocity; EAT, epicardial adipose tissue.

**Supplementary Table 1.**

Univariate linear regression analysis on the absolute value of baPWV.

|  | β | 95%CI | P value |
| --- | --- | --- | --- |
| Hypertension (Yes vs. No) | 0.244 | 0.044 to 0.439 | 0.017 |
| CAD (Yes vs. No) | 0.255 | 0.052 to 0.456 | 0.014 |
| Diabetes (Yes vs. No) | 0.176 | -0.027 to 0.375 | 0.088 |
| Hyperlipidemia (Yes vs. No) | -0.024 | -0.225 to 0.179 | 0.819 |
| Smoking (Yes vs. No) | -0.026 | -0.244 to 0.192 | 0.814 |
| Alcohol consumption (Yes vs. No) | -0.137 | -0.349 to 0.078 | 0.210 |

Abbreviation: CAD, coronary artery disease.
